# Supplementary material
Source: publisher figshare collection journal article supplement (https://springernature.figshare.com/ndownloader/files/16758698)
Supplement: Supplementary file [file 16758698]

# Emergency Medicine Residency Curriculum in Africa

Please complete the survey below.

Thank you!

---

## General Residency Questions

What country is your Emergency Medicine program in?

---

What Universit(ies) is your Emergency Medicine program housed at?

---

When did your Emergency Medicine program start?

- ☐ 1980
- ☐ 1981
- ☐ 1982
- ☐ 1983
- ☐ 1984
- ☐ 1985
- ☐ 1986
- ☐ 1987
- ☐ 1988
- ☐ 1989
- ☐ 1990
- ☐ 1991
- ☐ 1992
- ☐ 1993
- ☐ 1994
- ☐ 1995
- ☐ 1996
- ☐ 1997
- ☐ 1998
- ☐ 1999
- ☐ 2000
- ☐ 2001
- ☐ 2002
- ☐ 2003
- ☐ 2004
- ☐ 2005
- ☐ 2006
- ☐ 2007
- ☐ 2008
- ☐ 2009
- ☐ 2010
- ☐ 2011
- ☐ 2012
- ☐ 2013
- ☐ 2014
- ☐ 2015
- ☐ 2016
- ☐ 2017

Is Emergency Medicine a recognized speciality in your country?

- ☐ Yes
- ☐ No

Do you have a board or college that accredits all EM graduates in your country?

- ☐ Yes
- ☐ No

What are the MINIMUM entry requirements for the Emergency Medicine residency program (must be MD, Intern, GPA cutoff, work experience, etc) ?

---

What are the MINIMUM graduation requirements for Emergency Medicine program (must pass all course work, department recommendations, etc)?

---

How long is your residency training (in years)

- ☐ 1
- ☐ 2
- ☐ 3
- ☐ 4
- ☐ 5
- ☐ 6
- ☐ 7
- ☐ 8
- ☐ 9
- ☐ 10

How many residents do you accept in your residency program( the actual number on average each year)?

- ☐ 0
- ☐ 1
- ☐ 2
- ☐ 3
- ☐ 4
- ☐ 5
- ☐ 6
- ☐ 7
- ☐ 8
- ☐ 9
- ☐ 10
- ☐ 11
- ☐ 12
- ☐ 13
- ☐ 14
- ☐ 15
- ☐ 16
- ☐ 17
- ☐ 18
- ☐ 19
- ☐ 20
- ☐ 21
- ☐ 22
- ☐ 23
- ☐ 24
- ☐ 25
- ☐ 26
- ☐ 27
- ☐ 28
- ☐ 29
- ☐ 30
- ☐ 31
- ☐ 32
- ☐ 33
- ☐ 34
- ☐ 35
- ☐ 36
- ☐ 37
- ☐ 38
- ☐ 39
- ☐ 40
- ☐ 41
- ☐ 42
- ☐ 43
- ☐ 44
- ☐ 45
- ☐ 46
- ☐ 47
- ☐ 48
- ☐ 49
- ☐ 50
- ☐ 51
- ☐ 52
- ☐ 53
- ☐ 54
- ☐ 55
- ☐ 56
- ☐ 57
- ☐ 58
- ☐ 59
- ☐ 60
- ☐ 61
- ☐ 62
- ☐ 63
- ☐ 64
- ☐ 65
- ☐ 66
- ☐ 67
- ☐ 68
- ☐ 69

- ☐ 70
- ☐ 71
- ☐ 72
- ☐ 73
- ☐ 74
- ☐ 75
- ☐ 76
- ☐ 77
- ☐ 78
- ☐ 79
- ☐ 80
- ☐ 81
- ☐ 82
- ☐ 83
- ☐ 84
- ☐ 85
- ☐ 86
- ☐ 87
- ☐ 88
- ☐ 89
- ☐ 90
- ☐ 91
- ☐ 92
- ☐ 93
- ☐ 94
- ☐ 95
- ☐ 96
- ☐ 97
- ☐ 98
- ☐ 99
- ☐ 100

What is the percentage of foreign students in your program (estimate of current prospective students for the entire program)

- ☐ 0
- ☐ 1
- ☐ 2
- ☐ 3
- ☐ 4
- ☐ 5
- ☐ 6
- ☐ 7
- ☐ 8
- ☐ 9
- ☐ 10
- ☐ 11
- ☐ 12
- ☐ 13
- ☐ 14
- ☐ 15
- ☐ 16
- ☐ 17
- ☐ 18
- ☐ 19
- ☐ 20
- ☐ 21
- ☐ 22
- ☐ 23
- ☐ 24
- ☐ 25
- ☐ 26
- ☐ 27
- ☐ 28
- ☐ 29
- ☐ 30
- ☐ 31
- ☐ 32
- ☐ 33
- ☐ 34
- ☐ 35
- ☐ 36
- ☐ 37
- ☐ 38
- ☐ 39
- ☐ 40
- ☐ 41
- ☐ 42
- ☐ 43
- ☐ 44
- ☐ 45
- ☐ 46
- ☐ 47
- ☐ 48
- ☐ 49
- ☐ 50
- ☐ 51
- ☐ 52
- ☐ 53
- ☐ 54
- ☐ 55
- ☐ 56
- ☐ 57
- ☐ 58
- ☐ 59
- ☐ 60
- ☐ 61
- ☐ 62
- ☐ 63
- ☐ 64
- ☐ 65
- ☐ 66
- ☐ 67
- ☐ 68
- ☐ 69

- ☐ 70
- ☐ 71
- ☐ 72
- ☐ 73
- ☐ 74
- ☐ 75
- ☐ 76
- ☐ 77
- ☐ 78
- ☐ 79
- ☐ 80
- ☐ 81
- ☐ 82
- ☐ 83
- ☐ 84
- ☐ 85
- ☐ 86
- ☐ 87
- ☐ 88
- ☐ 89
- ☐ 90
- ☐ 91
- ☐ 92
- ☐ 93
- ☐ 94
- ☐ 95
- ☐ 96
- ☐ 97
- ☐ 98
- ☐ 99
- ☐ 100

What is the overall pass rate (to graduation) in your program (estimate in percentage)

- ☐ 0
- ☐ 1
- ☐ 2
- ☐ 3
- ☐ 4
- ☐ 5
- ☐ 6
- ☐ 7
- ☐ 8
- ☐ 9
- ☐ 10
- ☐ 11
- ☐ 12
- ☐ 13
- ☐ 14
- ☐ 15
- ☐ 16
- ☐ 17
- ☐ 18
- ☐ 19
- ☐ 20
- ☐ 21
- ☐ 22
- ☐ 23
- ☐ 24
- ☐ 25
- ☐ 26
- ☐ 27
- ☐ 28
- ☐ 29
- ☐ 30
- ☐ 31
- ☐ 32
- ☐ 33
- ☐ 34
- ☐ 35
- ☐ 36
- ☐ 37
- ☐ 38
- ☐ 39
- ☐ 40
- ☐ 41
- ☐ 42
- ☐ 43
- ☐ 44
- ☐ 45
- ☐ 46
- ☐ 47
- ☐ 48
- ☐ 49
- ☐ 50
- ☐ 51
- ☐ 52
- ☐ 53
- ☐ 54
- ☐ 55
- ☐ 56
- ☐ 57
- ☐ 58
- ☐ 59
- ☐ 60
- ☐ 61
- ☐ 62
- ☐ 63
- ☐ 64
- ☐ 65
- ☐ 66
- ☐ 67
- ☐ 68
- ☐ 69

- ☐ 70
- ☐ 71
- ☐ 72
- ☐ 73
- ☐ 74
- ☐ 75
- ☐ 76
- ☐ 77
- ☐ 78
- ☐ 79
- ☐ 80
- ☐ 81
- ☐ 82
- ☐ 83
- ☐ 84
- ☐ 85
- ☐ 86
- ☐ 87
- ☐ 88
- ☐ 89
- ☐ 90
- ☐ 91
- ☐ 92
- ☐ 93
- ☐ 94
- ☐ 95
- ☐ 96
- ☐ 97
- ☐ 98
- ☐ 99
- ☐ 100

Do you have collaborations both intra and inter country? (exchange programs, visiting faculty..etc)

- ☐ Yes
- ☐ No

If yes, mention them..

\_\_\_\_\_

---

---

### Faculty related questions

How many full-time faculty (university employed) do you have interacting with residents (including in the ED and in didactics)

- ☐ 0
- ☐ 1
- ☐ 2
- ☐ 3
- ☐ 4
- ☐ 5
- ☐ 6
- ☐ 7
- ☐ 8
- ☐ 9
- ☐ 10
- ☐ 11
- ☐ 12
- ☐ 13
- ☐ 14
- ☐ 15
- ☐ 16
- ☐ 17
- ☐ 18
- ☐ 19
- ☐ 20
- ☐ 21
- ☐ 22
- ☐ 23
- ☐ 24
- ☐ 25
- ☐ 26
- ☐ 27
- ☐ 28
- ☐ 29
- ☐ 30
- ☐ 31
- ☐ 32
- ☐ 33
- ☐ 34
- ☐ 35
- ☐ 36
- ☐ 37
- ☐ 38
- ☐ 39
- ☐ 40
- ☐ 41
- ☐ 42
- ☐ 43
- ☐ 44
- ☐ 45
- ☐ 46
- ☐ 47
- ☐ 48
- ☐ 49
- ☐ 50
- ☐ 51
- ☐ 52
- ☐ 53
- ☐ 54
- ☐ 55
- ☐ 56
- ☐ 57
- ☐ 58
- ☐ 59
- ☐ 60
- ☐ 61
- ☐ 62
- ☐ 63
- ☐ 64
- ☐ 65
- ☐ 66
- ☐ 67
- ☐ 68
- ☐ 69

- ☐ 70
- ☐ 71
- ☐ 72
- ☐ 73
- ☐ 74
- ☐ 75
- ☐ 76
- ☐ 77
- ☐ 78
- ☐ 79
- ☐ 80
- ☐ 81
- ☐ 82
- ☐ 83
- ☐ 84
- ☐ 85
- ☐ 86
- ☐ 87
- ☐ 88
- ☐ 89
- ☐ 90
- ☐ 91
- ☐ 92
- ☐ 93
- ☐ 94
- ☐ 95
- ☐ 96
- ☐ 97
- ☐ 98
- ☐ 99
- ☐ 100

How many of these full-time faculty (university employed) are men?

- ☐ 0
- ☐ 1
- ☐ 2
- ☐ 3
- ☐ 4
- ☐ 5
- ☐ 6
- ☐ 7
- ☐ 8
- ☐ 9
- ☐ 10
- ☐ 11
- ☐ 12
- ☐ 13
- ☐ 14
- ☐ 15
- ☐ 16
- ☐ 17
- ☐ 18
- ☐ 19
- ☐ 20
- ☐ 21
- ☐ 22
- ☐ 23
- ☐ 24
- ☐ 25
- ☐ 26
- ☐ 27
- ☐ 28
- ☐ 29
- ☐ 30
- ☐ 31
- ☐ 32
- ☐ 33
- ☐ 34
- ☐ 35
- ☐ 36
- ☐ 37
- ☐ 38
- ☐ 39
- ☐ 40
- ☐ 41
- ☐ 42
- ☐ 43
- ☐ 44
- ☐ 45
- ☐ 46
- ☐ 47
- ☐ 48
- ☐ 49
- ☐ 50
- ☐ 51
- ☐ 52
- ☐ 53
- ☐ 54
- ☐ 55
- ☐ 56
- ☐ 57
- ☐ 58
- ☐ 59
- ☐ 60
- ☐ 61
- ☐ 62
- ☐ 63
- ☐ 64
- ☐ 65
- ☐ 66
- ☐ 67
- ☐ 68
- ☐ 69

- ☐ 70
- ☐ 71
- ☐ 72
- ☐ 73
- ☐ 74
- ☐ 75
- ☐ 76
- ☐ 77
- ☐ 78
- ☐ 79
- ☐ 80
- ☐ 81
- ☐ 82
- ☐ 83
- ☐ 84
- ☐ 85
- ☐ 86
- ☐ 87
- ☐ 88
- ☐ 89
- ☐ 90
- ☐ 91
- ☐ 92
- ☐ 93
- ☐ 94
- ☐ 95
- ☐ 96
- ☐ 97
- ☐ 98
- ☐ 99
- ☐ 100

How many part\_time or honorary faculty do you have interacting with residents (including in the ED and in didactics)

- ☐ 0
- ☐ 1
- ☐ 2
- ☐ 3
- ☐ 4
- ☐ 5
- ☐ 6
- ☐ 7
- ☐ 8
- ☐ 9
- ☐ 10
- ☐ 11
- ☐ 12
- ☐ 13
- ☐ 14
- ☐ 15
- ☐ 16
- ☐ 17
- ☐ 18
- ☐ 19
- ☐ 20
- ☐ 21
- ☐ 22
- ☐ 23
- ☐ 24
- ☐ 25
- ☐ 26
- ☐ 27
- ☐ 28
- ☐ 29
- ☐ 30
- ☐ 31
- ☐ 32
- ☐ 33
- ☐ 34
- ☐ 35
- ☐ 36
- ☐ 37
- ☐ 38
- ☐ 39
- ☐ 40
- ☐ 41
- ☐ 42
- ☐ 43
- ☐ 44
- ☐ 45
- ☐ 46
- ☐ 47
- ☐ 48
- ☐ 49
- ☐ 50
- ☐ 51
- ☐ 52
- ☐ 53
- ☐ 54
- ☐ 55
- ☐ 56
- ☐ 57
- ☐ 58
- ☐ 59
- ☐ 60
- ☐ 61
- ☐ 62
- ☐ 63
- ☐ 64
- ☐ 65
- ☐ 66
- ☐ 67
- ☐ 68
- ☐ 69

- ☐ 70
- ☐ 71
- ☐ 72
- ☐ 73
- ☐ 74
- ☐ 75
- ☐ 76
- ☐ 77
- ☐ 78
- ☐ 79
- ☐ 80
- ☐ 81
- ☐ 82
- ☐ 83
- ☐ 84
- ☐ 85
- ☐ 86
- ☐ 87
- ☐ 88
- ☐ 89
- ☐ 90
- ☐ 91
- ☐ 92
- ☐ 93
- ☐ 94
- ☐ 95
- ☐ 96
- ☐ 97
- ☐ 98
- ☐ 99
- ☐ 100

How many of these part\_time faculty (honorary) are foreigners?

- ☐ 0
- ☐ 1
- ☐ 2
- ☐ 3
- ☐ 4
- ☐ 5
- ☐ 6
- ☐ 7
- ☐ 8
- ☐ 9
- ☐ 10
- ☐ 11
- ☐ 12
- ☐ 13
- ☐ 14
- ☐ 15
- ☐ 16
- ☐ 17
- ☐ 18
- ☐ 19
- ☐ 20
- ☐ 21
- ☐ 22
- ☐ 23
- ☐ 24
- ☐ 25
- ☐ 26
- ☐ 27
- ☐ 28
- ☐ 29
- ☐ 30
- ☐ 31
- ☐ 32
- ☐ 33
- ☐ 34
- ☐ 35
- ☐ 36
- ☐ 37
- ☐ 38
- ☐ 39
- ☐ 40
- ☐ 41
- ☐ 42
- ☐ 43
- ☐ 44
- ☐ 45
- ☐ 46
- ☐ 47
- ☐ 48
- ☐ 49
- ☐ 50
- ☐ 51
- ☐ 52
- ☐ 53
- ☐ 54
- ☐ 55
- ☐ 56
- ☐ 57
- ☐ 58
- ☐ 59
- ☐ 60
- ☐ 61
- ☐ 62
- ☐ 63
- ☐ 64
- ☐ 65
- ☐ 66
- ☐ 67
- ☐ 68
- ☐ 69

- ☐ 70
- ☐ 71
- ☐ 72
- ☐ 73
- ☐ 74
- ☐ 75
- ☐ 76
- ☐ 77
- ☐ 78
- ☐ 79
- ☐ 80
- ☐ 81
- ☐ 82
- ☐ 83
- ☐ 84
- ☐ 85
- ☐ 86
- ☐ 87
- ☐ 88
- ☐ 89
- ☐ 90
- ☐ 91
- ☐ 92
- ☐ 93
- ☐ 94
- ☐ 95
- ☐ 96
- ☐ 97
- ☐ 98
- ☐ 99
- ☐ 100

How many of these part\_time faculty (honorary) are men?

- ☐ 0
- ☐ 1
- ☐ 2
- ☐ 3
- ☐ 4
- ☐ 5
- ☐ 6
- ☐ 7
- ☐ 8
- ☐ 9
- ☐ 10
- ☐ 11
- ☐ 12
- ☐ 13
- ☐ 14
- ☐ 15
- ☐ 16
- ☐ 17
- ☐ 18
- ☐ 19
- ☐ 20
- ☐ 21
- ☐ 22
- ☐ 23
- ☐ 24
- ☐ 25
- ☐ 26
- ☐ 27
- ☐ 28
- ☐ 29
- ☐ 30
- ☐ 31
- ☐ 32
- ☐ 33
- ☐ 34
- ☐ 35
- ☐ 36
- ☐ 37
- ☐ 38
- ☐ 39
- ☐ 40
- ☐ 41
- ☐ 42
- ☐ 43
- ☐ 44
- ☐ 45
- ☐ 46
- ☐ 47
- ☐ 48
- ☐ 49
- ☐ 50
- ☐ 51
- ☐ 52
- ☐ 53
- ☐ 54
- ☐ 55
- ☐ 56
- ☐ 57
- ☐ 58
- ☐ 59
- ☐ 60
- ☐ 61
- ☐ 62
- ☐ 63
- ☐ 64
- ☐ 65
- ☐ 66
- ☐ 67
- ☐ 68
- ☐ 69

- ☐ 70
- ☐ 71
- ☐ 72
- ☐ 73
- ☐ 74
- ☐ 75
- ☐ 76
- ☐ 77
- ☐ 78
- ☐ 79
- ☐ 80
- ☐ 81
- ☐ 82
- ☐ 83
- ☐ 84
- ☐ 85
- ☐ 86
- ☐ 87
- ☐ 88
- ☐ 89
- ☐ 90
- ☐ 91
- ☐ 92
- ☐ 93
- ☐ 94
- ☐ 95
- ☐ 96
- ☐ 97
- ☐ 98
- ☐ 99
- ☐ 100

What are the specialty qualifications/training of the faculty?

- ☐ Emergency Medicine specialist or super specialists only
- ☐ Emergency Medicine and other non EM specialist
- ☐ Other non EM specialist
- ☐ Others

Mention other qualifications

---

How many faculty (university employed and honorary)  
are qualified as emergency medicine specialists?

- ☐ 0
- ☐ 1
- ☐ 2
- ☐ 3
- ☐ 4
- ☐ 5
- ☐ 6
- ☐ 7
- ☐ 8
- ☐ 9
- ☐ 10
- ☐ 11
- ☐ 12
- ☐ 13
- ☐ 14
- ☐ 15
- ☐ 16
- ☐ 17
- ☐ 18
- ☐ 19
- ☐ 20
- ☐ 21
- ☐ 22
- ☐ 23
- ☐ 24
- ☐ 25
- ☐ 26
- ☐ 27
- ☐ 28
- ☐ 29
- ☐ 30
- ☐ 31
- ☐ 32
- ☐ 33
- ☐ 34
- ☐ 35
- ☐ 36
- ☐ 37
- ☐ 38
- ☐ 39
- ☐ 40
- ☐ 41
- ☐ 42
- ☐ 43
- ☐ 44
- ☐ 45
- ☐ 46
- ☐ 47
- ☐ 48
- ☐ 49
- ☐ 50
- ☐ 51
- ☐ 52
- ☐ 53
- ☐ 54
- ☐ 55
- ☐ 56
- ☐ 57
- ☐ 58
- ☐ 59
- ☐ 60
- ☐ 61
- ☐ 62
- ☐ 63
- ☐ 64
- ☐ 65
- ☐ 66
- ☐ 67
- ☐ 68
- ☐ 69

- ☐ 70
- ☐ 71
- ☐ 72
- ☐ 73
- ☐ 74
- ☐ 75
- ☐ 76
- ☐ 77
- ☐ 78
- ☐ 79
- ☐ 80
- ☐ 81
- ☐ 82
- ☐ 83
- ☐ 84
- ☐ 85
- ☐ 86
- ☐ 87
- ☐ 88
- ☐ 89
- ☐ 90
- ☐ 91
- ☐ 92
- ☐ 93
- ☐ 94
- ☐ 95
- ☐ 96
- ☐ 97
- ☐ 98
- ☐ 99
- ☐ 100

How many of these qualified emergency physicians were trained in your country? (estimates)

- ☐ 0
- ☐ 1
- ☐ 2
- ☐ 3
- ☐ 4
- ☐ 5
- ☐ 6
- ☐ 7
- ☐ 8
- ☐ 9
- ☐ 10
- ☐ 11
- ☐ 12
- ☐ 13
- ☐ 14
- ☐ 15
- ☐ 16
- ☐ 17
- ☐ 18
- ☐ 19
- ☐ 20
- ☐ 21
- ☐ 22
- ☐ 23
- ☐ 24
- ☐ 25
- ☐ 26
- ☐ 27
- ☐ 28
- ☐ 29
- ☐ 30
- ☐ 31
- ☐ 32
- ☐ 33
- ☐ 34
- ☐ 35
- ☐ 36
- ☐ 37
- ☐ 38
- ☐ 39
- ☐ 40
- ☐ 41
- ☐ 42
- ☐ 43
- ☐ 44
- ☐ 45
- ☐ 46
- ☐ 47
- ☐ 48
- ☐ 49
- ☐ 50
- ☐ 51
- ☐ 52
- ☐ 53
- ☐ 54
- ☐ 55
- ☐ 56
- ☐ 57
- ☐ 58
- ☐ 59
- ☐ 60
- ☐ 61
- ☐ 62
- ☐ 63
- ☐ 64
- ☐ 65
- ☐ 66
- ☐ 67
- ☐ 68
- ☐ 69

- ☐ 70
- ☐ 71
- ☐ 72
- ☐ 73
- ☐ 74
- ☐ 75
- ☐ 76
- ☐ 77
- ☐ 78
- ☐ 79
- ☐ 80
- ☐ 81
- ☐ 82
- ☐ 83
- ☐ 84
- ☐ 85
- ☐ 86
- ☐ 87
- ☐ 88
- ☐ 89
- ☐ 90
- ☐ 91
- ☐ 92
- ☐ 93
- ☐ 94
- ☐ 95
- ☐ 96
- ☐ 97
- ☐ 98
- ☐ 99
- ☐ 100

How many of these qualified emergency physicians were trained from your current program? (estimates)

- ☐ 0
- ☐ 1
- ☐ 2
- ☐ 3
- ☐ 4
- ☐ 5
- ☐ 6
- ☐ 7
- ☐ 8
- ☐ 9
- ☐ 10
- ☐ 11
- ☐ 12
- ☐ 13
- ☐ 14
- ☐ 15
- ☐ 16
- ☐ 17
- ☐ 18
- ☐ 19
- ☐ 20
- ☐ 21
- ☐ 22
- ☐ 23
- ☐ 24
- ☐ 25
- ☐ 26
- ☐ 27
- ☐ 28
- ☐ 29
- ☐ 30
- ☐ 31
- ☐ 32
- ☐ 33
- ☐ 34
- ☐ 35
- ☐ 36
- ☐ 37
- ☐ 38
- ☐ 39
- ☐ 40
- ☐ 41
- ☐ 42
- ☐ 43
- ☐ 44
- ☐ 45
- ☐ 46
- ☐ 47
- ☐ 48
- ☐ 49
- ☐ 50
- ☐ 51
- ☐ 52
- ☐ 53
- ☐ 54
- ☐ 55
- ☐ 56
- ☐ 57
- ☐ 58
- ☐ 59
- ☐ 60
- ☐ 61
- ☐ 62
- ☐ 63
- ☐ 64
- ☐ 65
- ☐ 66
- ☐ 67
- ☐ 68
- ☐ 69

- ☐ 70
- ☐ 71
- ☐ 72
- ☐ 73
- ☐ 74
- ☐ 75
- ☐ 76
- ☐ 77
- ☐ 78
- ☐ 79
- ☐ 80
- ☐ 81
- ☐ 82
- ☐ 83
- ☐ 84
- ☐ 85
- ☐ 86
- ☐ 87
- ☐ 88
- ☐ 89
- ☐ 90
- ☐ 91
- ☐ 92
- ☐ 93
- ☐ 94
- ☐ 95
- ☐ 96
- ☐ 97
- ☐ 98
- ☐ 99
- ☐ 100

---

---

**Sustainability/ future of program questions**

How many graduates do you have to date (since the program started)?

- ☐ 0
- ☐ 1
- ☐ 2
- ☐ 3
- ☐ 4
- ☐ 5
- ☐ 6
- ☐ 7
- ☐ 8
- ☐ 9
- ☐ 10
- ☐ 11
- ☐ 12
- ☐ 13
- ☐ 14
- ☐ 15
- ☐ 16
- ☐ 17
- ☐ 18
- ☐ 19
- ☐ 20
- ☐ 21
- ☐ 22
- ☐ 23
- ☐ 24
- ☐ 25
- ☐ 26
- ☐ 27
- ☐ 28
- ☐ 29
- ☐ 30
- ☐ 31
- ☐ 32
- ☐ 33
- ☐ 34
- ☐ 35
- ☐ 36
- ☐ 37
- ☐ 38
- ☐ 39
- ☐ 40
- ☐ 41
- ☐ 42
- ☐ 43
- ☐ 44
- ☐ 45
- ☐ 46
- ☐ 47
- ☐ 48
- ☐ 49
- ☐ 50
- ☐ 51
- ☐ 52
- ☐ 53
- ☐ 54
- ☐ 55
- ☐ 56
- ☐ 57
- ☐ 58
- ☐ 59
- ☐ 60
- ☐ 61
- ☐ 62
- ☐ 63
- ☐ 64
- ☐ 65
- ☐ 66
- ☐ 67
- ☐ 68
- ☐ 69

- ☐ 70
- ☐ 71
- ☐ 72
- ☐ 73
- ☐ 74
- ☐ 75
- ☐ 76
- ☐ 77
- ☐ 78
- ☐ 79
- ☐ 80
- ☐ 81
- ☐ 82
- ☐ 83
- ☐ 84
- ☐ 85
- ☐ 86
- ☐ 87
- ☐ 88
- ☐ 89
- ☐ 90
- ☐ 91
- ☐ 92
- ☐ 93
- ☐ 94
- ☐ 95
- ☐ 96
- ☐ 97
- ☐ 98
- ☐ 99
- ☐ 100

How many of these graduates were men?

- ☐ 0
- ☐ 1
- ☐ 2
- ☐ 3
- ☐ 4
- ☐ 5
- ☐ 6
- ☐ 7
- ☐ 8
- ☐ 9
- ☐ 10
- ☐ 11
- ☐ 12
- ☐ 13
- ☐ 14
- ☐ 15
- ☐ 16
- ☐ 17
- ☐ 18
- ☐ 19
- ☐ 20
- ☐ 21
- ☐ 22
- ☐ 23
- ☐ 24
- ☐ 25
- ☐ 26
- ☐ 27
- ☐ 28
- ☐ 29
- ☐ 30
- ☐ 31
- ☐ 32
- ☐ 33
- ☐ 34
- ☐ 35
- ☐ 36
- ☐ 37
- ☐ 38
- ☐ 39
- ☐ 40
- ☐ 41
- ☐ 42
- ☐ 43
- ☐ 44
- ☐ 45
- ☐ 46
- ☐ 47
- ☐ 48
- ☐ 49
- ☐ 50
- ☐ 51
- ☐ 52
- ☐ 53
- ☐ 54
- ☐ 55
- ☐ 56
- ☐ 57
- ☐ 58
- ☐ 59
- ☐ 60
- ☐ 61
- ☐ 62
- ☐ 63
- ☐ 64
- ☐ 65
- ☐ 66
- ☐ 67
- ☐ 68
- ☐ 69

- ☐ 70
- ☐ 71
- ☐ 72
- ☐ 73
- ☐ 74
- ☐ 75
- ☐ 76
- ☐ 77
- ☐ 78
- ☐ 79
- ☐ 80
- ☐ 81
- ☐ 82
- ☐ 83
- ☐ 84
- ☐ 85
- ☐ 86
- ☐ 87
- ☐ 88
- ☐ 89
- ☐ 90
- ☐ 91
- ☐ 92
- ☐ 93
- ☐ 94
- ☐ 95
- ☐ 96
- ☐ 97
- ☐ 98
- ☐ 99
- ☐ 100

What percentage of your graduates stay as faculty within your program after graduation (estimates)?

- ☐ 0
- ☐ 1
- ☐ 2
- ☐ 3
- ☐ 4
- ☐ 5
- ☐ 6
- ☐ 7
- ☐ 8
- ☐ 9
- ☐ 10
- ☐ 11
- ☐ 12
- ☐ 13
- ☐ 14
- ☐ 15
- ☐ 16
- ☐ 17
- ☐ 18
- ☐ 19
- ☐ 20
- ☐ 21
- ☐ 22
- ☐ 23
- ☐ 24
- ☐ 25
- ☐ 26
- ☐ 27
- ☐ 28
- ☐ 29
- ☐ 30
- ☐ 31
- ☐ 32
- ☐ 33
- ☐ 34
- ☐ 35
- ☐ 36
- ☐ 37
- ☐ 38
- ☐ 39
- ☐ 40
- ☐ 41
- ☐ 42
- ☐ 43
- ☐ 44
- ☐ 45
- ☐ 46
- ☐ 47
- ☐ 48
- ☐ 49
- ☐ 50
- ☐ 51
- ☐ 52
- ☐ 53
- ☐ 54
- ☐ 55
- ☐ 56
- ☐ 57
- ☐ 58
- ☐ 59
- ☐ 60
- ☐ 61
- ☐ 62
- ☐ 63
- ☐ 64
- ☐ 65
- ☐ 66
- ☐ 67
- ☐ 68
- ☐ 69

- ☐ 70
- ☐ 71
- ☐ 72
- ☐ 73
- ☐ 74
- ☐ 75
- ☐ 76
- ☐ 77
- ☐ 78
- ☐ 79
- ☐ 80
- ☐ 81
- ☐ 82
- ☐ 83
- ☐ 84
- ☐ 85
- ☐ 86
- ☐ 87
- ☐ 88
- ☐ 89
- ☐ 90
- ☐ 91
- ☐ 92
- ☐ 93
- ☐ 94
- ☐ 95
- ☐ 96
- ☐ 97
- ☐ 98
- ☐ 99
- ☐ 100

What percentage of your graduates who are citizens of your country, have left to pursue EM jobs abroad after graduation (estimates)?

- ☐ 0
- ☐ 1
- ☐ 2
- ☐ 3
- ☐ 4
- ☐ 5
- ☐ 6
- ☐ 7
- ☐ 8
- ☐ 9
- ☐ 10
- ☐ 11
- ☐ 12
- ☐ 13
- ☐ 14
- ☐ 15
- ☐ 16
- ☐ 17
- ☐ 18
- ☐ 19
- ☐ 20
- ☐ 21
- ☐ 22
- ☐ 23
- ☐ 24
- ☐ 25
- ☐ 26
- ☐ 27
- ☐ 28
- ☐ 29
- ☐ 30
- ☐ 31
- ☐ 32
- ☐ 33
- ☐ 34
- ☐ 35
- ☐ 36
- ☐ 37
- ☐ 38
- ☐ 39
- ☐ 40
- ☐ 41
- ☐ 42
- ☐ 43
- ☐ 44
- ☐ 45
- ☐ 46
- ☐ 47
- ☐ 48
- ☐ 49
- ☐ 50
- ☐ 51
- ☐ 52
- ☐ 53
- ☐ 54
- ☐ 55
- ☐ 56
- ☐ 57
- ☐ 58
- ☐ 59
- ☐ 60
- ☐ 61
- ☐ 62
- ☐ 63
- ☐ 64
- ☐ 65
- ☐ 66
- ☐ 67
- ☐ 68
- ☐ 69

- ☐ 70
- ☐ 71
- ☐ 72
- ☐ 73
- ☐ 74
- ☐ 75
- ☐ 76
- ☐ 77
- ☐ 78
- ☐ 79
- ☐ 80
- ☐ 81
- ☐ 82
- ☐ 83
- ☐ 84
- ☐ 85
- ☐ 86
- ☐ 87
- ☐ 88
- ☐ 89
- ☐ 90
- ☐ 91
- ☐ 92
- ☐ 93
- ☐ 94
- ☐ 95
- ☐ 96
- ☐ 97
- ☐ 98
- ☐ 99
- ☐ 100

What percentage of your graduates who are citizens of your country, have gone-on to develop/staff emergency and casualty units in other regions/provinces within your country after graduation (estimates)?

- ☐ 0
- ☐ 1
- ☐ 2
- ☐ 3
- ☐ 4
- ☐ 5
- ☐ 6
- ☐ 7
- ☐ 8
- ☐ 9
- ☐ 10
- ☐ 11
- ☐ 12
- ☐ 13
- ☐ 14
- ☐ 15
- ☐ 16
- ☐ 17
- ☐ 18
- ☐ 19
- ☐ 20
- ☐ 21
- ☐ 22
- ☐ 23
- ☐ 24
- ☐ 25
- ☐ 26
- ☐ 27
- ☐ 28
- ☐ 29
- ☐ 30
- ☐ 31
- ☐ 32
- ☐ 33
- ☐ 34
- ☐ 35
- ☐ 36
- ☐ 37
- ☐ 38
- ☐ 39
- ☐ 40
- ☐ 41
- ☐ 42
- ☐ 43
- ☐ 44
- ☐ 45
- ☐ 46
- ☐ 47
- ☐ 48
- ☐ 49
- ☐ 50
- ☐ 51
- ☐ 52
- ☐ 53
- ☐ 54
- ☐ 55
- ☐ 56
- ☐ 57
- ☐ 58
- ☐ 59
- ☐ 60
- ☐ 61
- ☐ 62
- ☐ 63
- ☐ 64
- ☐ 65
- ☐ 66
- ☐ 67
- ☐ 68
- ☐ 69

- ☐ 70
- ☐ 71
- ☐ 72
- ☐ 73
- ☐ 74
- ☐ 75
- ☐ 76
- ☐ 77
- ☐ 78
- ☐ 79
- ☐ 80
- ☐ 81
- ☐ 82
- ☐ 83
- ☐ 84
- ☐ 85
- ☐ 86
- ☐ 87
- ☐ 88
- ☐ 89
- ☐ 90
- ☐ 91
- ☐ 92
- ☐ 93
- ☐ 94
- ☐ 95
- ☐ 96
- ☐ 97
- ☐ 98
- ☐ 99
- ☐ 100

What percentage of your graduates who are citizens of your country, have gone on to private practise within the country after graduation (estimates)?

- ☐ 0
- ☐ 1
- ☐ 2
- ☐ 3
- ☐ 4
- ☐ 5
- ☐ 6
- ☐ 7
- ☐ 8
- ☐ 9
- ☐ 10
- ☐ 11
- ☐ 12
- ☐ 13
- ☐ 14
- ☐ 15
- ☐ 16
- ☐ 17
- ☐ 18
- ☐ 19
- ☐ 20
- ☐ 21
- ☐ 22
- ☐ 23
- ☐ 24
- ☐ 25
- ☐ 26
- ☐ 27
- ☐ 28
- ☐ 29
- ☐ 30
- ☐ 31
- ☐ 32
- ☐ 33
- ☐ 34
- ☐ 35
- ☐ 36
- ☐ 37
- ☐ 38
- ☐ 39
- ☐ 40
- ☐ 41
- ☐ 42
- ☐ 43
- ☐ 44
- ☐ 45
- ☐ 46
- ☐ 47
- ☐ 48
- ☐ 49
- ☐ 50
- ☐ 51
- ☐ 52
- ☐ 53
- ☐ 54
- ☐ 55
- ☐ 56
- ☐ 57
- ☐ 58
- ☐ 59
- ☐ 60
- ☐ 61
- ☐ 62
- ☐ 63
- ☐ 64
- ☐ 65
- ☐ 66
- ☐ 67
- ☐ 68
- ☐ 69

- ☐ 70
- ☐ 71
- ☐ 72
- ☐ 73
- ☐ 74
- ☐ 75
- ☐ 76
- ☐ 77
- ☐ 78
- ☐ 79
- ☐ 80
- ☐ 81
- ☐ 82
- ☐ 83
- ☐ 84
- ☐ 85
- ☐ 86
- ☐ 87
- ☐ 88
- ☐ 89
- ☐ 90
- ☐ 91
- ☐ 92
- ☐ 93
- ☐ 94
- ☐ 95
- ☐ 96
- ☐ 97
- ☐ 98
- ☐ 99
- ☐ 100

What percentage of your graduates have left to pursue  
Non-EM related jobs /opportunities after graduation?  
(estimates)?

- ☐ 0
- ☐ 1
- ☐ 2
- ☐ 3
- ☐ 4
- ☐ 5
- ☐ 6
- ☐ 7
- ☐ 8
- ☐ 9
- ☐ 10
- ☐ 11
- ☐ 12
- ☐ 13
- ☐ 14
- ☐ 15
- ☐ 16
- ☐ 17
- ☐ 18
- ☐ 19
- ☐ 20
- ☐ 21
- ☐ 22
- ☐ 23
- ☐ 24
- ☐ 25
- ☐ 26
- ☐ 27
- ☐ 28
- ☐ 29
- ☐ 30
- ☐ 31
- ☐ 32
- ☐ 33
- ☐ 34
- ☐ 35
- ☐ 36
- ☐ 37
- ☐ 38
- ☐ 39
- ☐ 40
- ☐ 41
- ☐ 42
- ☐ 43
- ☐ 44
- ☐ 45
- ☐ 46
- ☐ 47
- ☐ 48
- ☐ 49
- ☐ 50
- ☐ 51
- ☐ 52
- ☐ 53
- ☐ 54
- ☐ 55
- ☐ 56
- ☐ 57
- ☐ 58
- ☐ 59
- ☐ 60
- ☐ 61
- ☐ 62
- ☐ 63
- ☐ 64
- ☐ 65
- ☐ 66
- ☐ 67
- ☐ 68
- ☐ 69

- ☐ 70
- ☐ 71
- ☐ 72
- ☐ 73
- ☐ 74
- ☐ 75
- ☐ 76
- ☐ 77
- ☐ 78
- ☐ 79
- ☐ 80
- ☐ 81
- ☐ 82
- ☐ 83
- ☐ 84
- ☐ 85
- ☐ 86
- ☐ 87
- ☐ 88
- ☐ 89
- ☐ 90
- ☐ 91
- ☐ 92
- ☐ 93
- ☐ 94
- ☐ 95
- ☐ 96
- ☐ 97
- ☐ 98
- ☐ 99
- ☐ 100

What is the plan for sustainability of your training program and for establishing EM as a financially viable career option?

---



---

### Curriculum structure questions

Did you participate in the initial design of the curriculum and objectives in your institution?

- ☐ Yes
- ☐ No

If you participated in designing your curriculum, did you encounter any challenges

- ☐ Yes
- ☐ No
- ☐ Not applicable

Briefly explain the challenges you encountered.

---

EM training in your country was started by

- ☐ Local faculty who is EM trained
- ☐ Local faculty who is NOT-EM trained
- ☐ Local faculty who is EM trained in collaboration with International partners
- ☐ Local faculty who is NOT EM trained in collaboration with International partners
- ☐ International partners
- ☐ Others

mention other

---

Was the initial curriculum developed by EM trained Specialist ?

- ☐ Yes
- ☐ No

Is your curriculum modeled after another African, Australian, American, Asian or European program?

- ☐ Yes  
☐ No

Which country was your curriculum modeled from?

\_\_\_\_\_

Does AFEM or IFEM or ACEP or SAEM or ACEM or Your National professional Society influence your curriculum?

- ☐ Yes  
☐ No

Briefly elaborate how

\_\_\_\_\_

Has your curriculum changed since start of program?

- ☐ Yes  
☐ No

Point out the key areas on the changes

\_\_\_\_\_

How often is the curriculum reviewed for changes?

- ☐ Once every 1 year  
☐ Once every 2 years  
☐ Once every 3 years  
☐ Once every 4 years  
☐ Once every 5 years  
☐ Once every 10 years  
☐ Once every 20 years  
☐ Others  
☐ No specific timing of review

Explain other

\_\_\_\_\_

Do you have any challenges implementing the current curriculum?

- ☐ Yes  
☐ No

Explain the challenges

\_\_\_\_\_

Is your residency program a '3 years' program?

- ☐ Yes  
☐ No

**Below are questions regarding the rotations that your residents perform.**

**Please indicate which rotations your residents perform during first year through fourth year plus.**

|                                                                         | Residency year 1         | Residency year 2         | Residency year 3         | Residency year 4         | Residency year 4+        |
|-------------------------------------------------------------------------|--------------------------|--------------------------|--------------------------|--------------------------|--------------------------|
| Emergency Medicine                                                      | <input type="checkbox"/> | <input type="checkbox"/> | <input type="checkbox"/> | <input type="checkbox"/> | <input type="checkbox"/> |
| Internal medicine                                                       | <input type="checkbox"/> | <input type="checkbox"/> | <input type="checkbox"/> | <input type="checkbox"/> | <input type="checkbox"/> |
| Pediatrics                                                              | <input type="checkbox"/> | <input type="checkbox"/> | <input type="checkbox"/> | <input type="checkbox"/> | <input type="checkbox"/> |
| Cardiology                                                              | <input type="checkbox"/> | <input type="checkbox"/> | <input type="checkbox"/> | <input type="checkbox"/> | <input type="checkbox"/> |
| Obstetrics and gynaecology                                              | <input type="checkbox"/> | <input type="checkbox"/> | <input type="checkbox"/> | <input type="checkbox"/> | <input type="checkbox"/> |
| Orthopedics and Trauma                                                  | <input type="checkbox"/> | <input type="checkbox"/> | <input type="checkbox"/> | <input type="checkbox"/> | <input type="checkbox"/> |
| Surgery                                                                 | <input type="checkbox"/> | <input type="checkbox"/> | <input type="checkbox"/> | <input type="checkbox"/> | <input type="checkbox"/> |
| Neurosurgery                                                            | <input type="checkbox"/> | <input type="checkbox"/> | <input type="checkbox"/> | <input type="checkbox"/> | <input type="checkbox"/> |
| Anesthesia                                                              | <input type="checkbox"/> | <input type="checkbox"/> | <input type="checkbox"/> | <input type="checkbox"/> | <input type="checkbox"/> |
| Radiology                                                               | <input type="checkbox"/> | <input type="checkbox"/> | <input type="checkbox"/> | <input type="checkbox"/> | <input type="checkbox"/> |
| Psychiatry                                                              | <input type="checkbox"/> | <input type="checkbox"/> | <input type="checkbox"/> | <input type="checkbox"/> | <input type="checkbox"/> |
| Toxicology                                                              | <input type="checkbox"/> | <input type="checkbox"/> | <input type="checkbox"/> | <input type="checkbox"/> | <input type="checkbox"/> |
| Elective                                                                | <input type="checkbox"/> | <input type="checkbox"/> | <input type="checkbox"/> | <input type="checkbox"/> | <input type="checkbox"/> |
| Pre-hospital medicine/EMS                                               | <input type="checkbox"/> | <input type="checkbox"/> | <input type="checkbox"/> | <input type="checkbox"/> | <input type="checkbox"/> |
| Medical intensive care unit                                             | <input type="checkbox"/> | <input type="checkbox"/> | <input type="checkbox"/> | <input type="checkbox"/> | <input type="checkbox"/> |
| Pediatrics intensive care unit                                          | <input type="checkbox"/> | <input type="checkbox"/> | <input type="checkbox"/> | <input type="checkbox"/> | <input type="checkbox"/> |
| Neonatal Intensive care unit                                            | <input type="checkbox"/> | <input type="checkbox"/> | <input type="checkbox"/> | <input type="checkbox"/> | <input type="checkbox"/> |
| Surgical intensive care unit                                            | <input type="checkbox"/> | <input type="checkbox"/> | <input type="checkbox"/> | <input type="checkbox"/> | <input type="checkbox"/> |
| Cardiac intensive care unit                                             | <input type="checkbox"/> | <input type="checkbox"/> | <input type="checkbox"/> | <input type="checkbox"/> | <input type="checkbox"/> |
| Neurologic intensive care unit                                          | <input type="checkbox"/> | <input type="checkbox"/> | <input type="checkbox"/> | <input type="checkbox"/> | <input type="checkbox"/> |
| International visiting<br>elective(countries and<br>programs?)<br>other | <input type="checkbox"/> | <input type="checkbox"/> | <input type="checkbox"/> | <input type="checkbox"/> | <input type="checkbox"/> |
| No external rotation                                                    | <input type="checkbox"/> | <input type="checkbox"/> | <input type="checkbox"/> | <input type="checkbox"/> | <input type="checkbox"/> |
| Not applicable                                                          | <input type="checkbox"/> | <input type="checkbox"/> | <input type="checkbox"/> | <input type="checkbox"/> | <input type="checkbox"/> |

Briefly mention duration in weeks for rotations offered to year one residents per each rotation.

---

Briefly mention duration in weeks for rotations offered to year two residents per each rotation.

---

Briefly mention duration in weeks for rotations offered to year three residents per each rotation

---

Briefly mention duration in weeks for rotations offered to year four residents per each rotation

---

Briefly mention duration in weeks for rotations offered to year four + residents per each rotation.

---

Does your residency training program include mandatory biomedical science courses (example anatomy, physiology, microbiology, pharmacology etc)?

- ☐ Yes  
☐ No

List the biomedical courses that your residents undertake

---

When rotating in Emergency Medicine department ,how many shifts per month do your 1st year residents cover within the emergency department?(average)

- ☐ 1
- ☐ 2
- ☐ 3
- ☐ 4
- ☐ 5
- ☐ 6
- ☐ 7
- ☐ 8
- ☐ 9
- ☐ 10
- ☐ 11
- ☐ 12
- ☐ 13
- ☐ 14
- ☐ 15
- ☐ 16
- ☐ 17
- ☐ 18
- ☐ 19
- ☐ 20
- ☐ 21
- ☐ 22
- ☐ 23
- ☐ 24
- ☐ 25
- ☐ 26
- ☐ 27
- ☐ 28
- ☐ 29
- ☐ 30
- ☐ 31
- ☐ 32
- ☐ 33
- ☐ 34
- ☐ 35
- ☐ 36
- ☐ 37
- ☐ 38
- ☐ 39
- ☐ 40
- ☐ 41
- ☐ 42
- ☐ 43
- ☐ 44
- ☐ 45
- ☐ 46
- ☐ 47
- ☐ 48
- ☐ 49
- ☐ 50
- ☐ 51
- ☐ 52
- ☐ 53
- ☐ 54
- ☐ 55
- ☐ 56
- ☐ 57
- ☐ 58
- ☐ 59
- ☐ 60

When rotating in Emergency Medicine department ,how many shifts per month do your 2nd year residents cover within the emergency department?(average)

- ☐ 1
- ☐ 2
- ☐ 3
- ☐ 4
- ☐ 5
- ☐ 6
- ☐ 7
- ☐ 8
- ☐ 9
- ☐ 10
- ☐ 11
- ☐ 12
- ☐ 13
- ☐ 14
- ☐ 15
- ☐ 16
- ☐ 17
- ☐ 18
- ☐ 19
- ☐ 20
- ☐ 21
- ☐ 22
- ☐ 23
- ☐ 24
- ☐ 25
- ☐ 26
- ☐ 27
- ☐ 28
- ☐ 29
- ☐ 30
- ☐ 31
- ☐ 32
- ☐ 33
- ☐ 34
- ☐ 35
- ☐ 36
- ☐ 37
- ☐ 38
- ☐ 39
- ☐ 40
- ☐ 41
- ☐ 42
- ☐ 43
- ☐ 44
- ☐ 45
- ☐ 46
- ☐ 47
- ☐ 48
- ☐ 49
- ☐ 50
- ☐ 51
- ☐ 52
- ☐ 53
- ☐ 54
- ☐ 55
- ☐ 56
- ☐ 57
- ☐ 58
- ☐ 59
- ☐ 60

When rotating in Emergency Medicine department, how many shifts per month do your 3rd year residents cover within the emergency department?(average)

- ☐ 1
- ☐ 2
- ☐ 3
- ☐ 4
- ☐ 5
- ☐ 6
- ☐ 7
- ☐ 8
- ☐ 9
- ☐ 10
- ☐ 11
- ☐ 12
- ☐ 13
- ☐ 14
- ☐ 15
- ☐ 16
- ☐ 17
- ☐ 18
- ☐ 19
- ☐ 20
- ☐ 21
- ☐ 22
- ☐ 23
- ☐ 24
- ☐ 25
- ☐ 26
- ☐ 27
- ☐ 28
- ☐ 29
- ☐ 30
- ☐ 31
- ☐ 32
- ☐ 33
- ☐ 34
- ☐ 35
- ☐ 36
- ☐ 37
- ☐ 38
- ☐ 39
- ☐ 40
- ☐ 41
- ☐ 42
- ☐ 43
- ☐ 44
- ☐ 45
- ☐ 46
- ☐ 47
- ☐ 48
- ☐ 49
- ☐ 50
- ☐ 51
- ☐ 52
- ☐ 53
- ☐ 54
- ☐ 55
- ☐ 56
- ☐ 57
- ☐ 58
- ☐ 59
- ☐ 60

When rotating in Emergency Medicine department, how many shifts per month do your 4th year residents cover within the emergency department?(average)

- ☐ 1
- ☐ 2
- ☐ 3
- ☐ 4
- ☐ 5
- ☐ 6
- ☐ 7
- ☐ 8
- ☐ 9
- ☐ 10
- ☐ 11
- ☐ 12
- ☐ 13
- ☐ 14
- ☐ 15
- ☐ 16
- ☐ 17
- ☐ 18
- ☐ 19
- ☐ 20
- ☐ 21
- ☐ 22
- ☐ 23
- ☐ 24
- ☐ 25
- ☐ 26
- ☐ 27
- ☐ 28
- ☐ 29
- ☐ 30
- ☐ 31
- ☐ 32
- ☐ 33
- ☐ 34
- ☐ 35
- ☐ 36
- ☐ 37
- ☐ 38
- ☐ 39
- ☐ 40
- ☐ 41
- ☐ 42
- ☐ 43
- ☐ 44
- ☐ 45
- ☐ 46
- ☐ 47
- ☐ 48
- ☐ 49
- ☐ 50
- ☐ 51
- ☐ 52
- ☐ 53
- ☐ 54
- ☐ 55
- ☐ 56
- ☐ 57
- ☐ 58
- ☐ 59
- ☐ 60

When rotating in Emergency Medicine department, how many shifts per month do your 4+ year residents cover within the emergency department? (average)

- ☐ 1
- ☐ 2
- ☐ 3
- ☐ 4
- ☐ 5
- ☐ 6
- ☐ 7
- ☐ 8
- ☐ 9
- ☐ 10
- ☐ 11
- ☐ 12
- ☐ 13
- ☐ 14
- ☐ 15
- ☐ 16
- ☐ 17
- ☐ 18
- ☐ 19
- ☐ 20
- ☐ 21
- ☐ 22
- ☐ 23
- ☐ 24
- ☐ 25
- ☐ 26
- ☐ 27
- ☐ 28
- ☐ 29
- ☐ 30
- ☐ 31
- ☐ 32
- ☐ 33
- ☐ 34
- ☐ 35
- ☐ 36
- ☐ 37
- ☐ 38
- ☐ 39
- ☐ 40
- ☐ 41
- ☐ 42
- ☐ 43
- ☐ 44
- ☐ 45
- ☐ 46
- ☐ 47
- ☐ 48
- ☐ 49
- ☐ 50
- ☐ 51
- ☐ 52
- ☐ 53
- ☐ 54
- ☐ 55
- ☐ 56
- ☐ 57
- ☐ 58
- ☐ 59
- ☐ 60

How many hours is the shifts for your 1st year residents?

- ☐ 1
- ☐ 2
- ☐ 3
- ☐ 4
- ☐ 5
- ☐ 6
- ☐ 7
- ☐ 8
- ☐ 9
- ☐ 10
- ☐ 11
- ☐ 12
- ☐ 13
- ☐ 14
- ☐ 15
- ☐ 16
- ☐ 17
- ☐ 18
- ☐ 19
- ☐ 20
- ☐ 21
- ☐ 22
- ☐ 23
- ☐ 24

How many hours is the shifts for your 2nd year residents?

- ☐ 1
- ☐ 2
- ☐ 3
- ☐ 4
- ☐ 5
- ☐ 6
- ☐ 7
- ☐ 8
- ☐ 9
- ☐ 10
- ☐ 11
- ☐ 12
- ☐ 13
- ☐ 14
- ☐ 15
- ☐ 16
- ☐ 17
- ☐ 18
- ☐ 19
- ☐ 20
- ☐ 21
- ☐ 22
- ☐ 23
- ☐ 24

How many hours is the shifts for your 3rd year residents?

- ☐ 1
- ☐ 2
- ☐ 3
- ☐ 4
- ☐ 5
- ☐ 6
- ☐ 7
- ☐ 8
- ☐ 9
- ☐ 10
- ☐ 11
- ☐ 12
- ☐ 13
- ☐ 14
- ☐ 15
- ☐ 16
- ☐ 17
- ☐ 18
- ☐ 19
- ☐ 20
- ☐ 21
- ☐ 22
- ☐ 23
- ☐ 24

How many hours is the shifts for your 4th year residents?

- ☐ 1
- ☐ 2
- ☐ 3
- ☐ 4
- ☐ 5
- ☐ 6
- ☐ 7
- ☐ 8
- ☐ 9
- ☐ 10
- ☐ 11
- ☐ 12
- ☐ 13
- ☐ 14
- ☐ 15
- ☐ 16
- ☐ 17
- ☐ 18
- ☐ 19
- ☐ 20
- ☐ 21
- ☐ 22
- ☐ 23
- ☐ 24

How many hours is the shifts for your 4+ year residents?

- ☐ 1
- ☐ 2
- ☐ 3
- ☐ 4
- ☐ 5
- ☐ 6
- ☐ 7
- ☐ 8
- ☐ 9
- ☐ 10
- ☐ 11
- ☐ 12
- ☐ 13
- ☐ 14
- ☐ 15
- ☐ 16
- ☐ 17
- ☐ 18
- ☐ 19
- ☐ 20
- ☐ 21
- ☐ 22
- ☐ 23
- ☐ 24

Does every clinical shift have a supervising emergency medicine specialist on site at all times?

- ☐ Yes
- ☐ No

Briefly describe how supervision is conducted

---

Do you have didactic sessions for residents?

- ☐ Yes
- ☐ No

How many per month?(in hours)

---

Do you have journal clubs?

- ☐ Yes
- ☐ No

How many per month? (in hours)

---

Do residents lead journal club ?

- ☐ Yes
- ☐ No

Do residents give a lecture during didactics? I

- ☐ Yes
- ☐ No

In what year (s) of residency do they give a lecture?  
How often do they do it?

---

In what year (s) of residency do they lead journal club? How often do they do it?

---

Is the Dissertation research required part of EM residency

- ☐ Yes
- ☐ No

Is it required to be published?

- ☐ Yes
- ☐ No

How are your residents evaluated in the emergency department (Feedback, Exams, Other)?

---

How are your residents evaluated when in External rotation (Feedback, Exams, Other)?

---
